# Supplementary material for: Kidney Disease in the Caribbean-APOL1 Risk Alleles and Emerging Environmental Stressors
Source: PubMed Central journal article supplement — Kidney Int Rep. 2024 May 7;9(7):1947–50. doi: 10.1016/j.ekir.2024.04.071 (PMC11284400; doi:10.1016/j.ekir.2024.04.071), 2024-05-07
Supplement: mmc1.pdf [file mmc1.pdf]

## Figures and Tables

**Supplemental Table 1: Link between past and present: proportion of enslaved persons, current Black population, and estimated West African ancestry**

| Colony            | Year <sup>^</sup> | Total Population <sup>^</sup> | Enslaved persons % <sup>^</sup> | Year * | Total Population <sup>n*</sup> | Total Black Population | African Ancestry % |
|-------------------|-------------------|-------------------------------|---------------------------------|--------|--------------------------------|------------------------|--------------------|
| Bahamas           | 1810              | 16,718                        | 66.7                            | 2021   | 407,906                        | 369,562                | 96 <sup>a</sup>    |
| Barbados          | 1834              | 100,000                       | 80.6                            | 2021   | 281,200                        | 258,704                | 84.1 <sup>b</sup>  |
| Jamaica           | 1880              | 340,000                       | 88.2                            | 2021   | 2,827,695                      | 2,471,946              | 80.8 <sup>b</sup>  |
| St. Lucia         | 1810              | 17,485                        | 82.3                            | 2021   | 179,651                        | 153,242                | 75 <sup>a</sup>    |
| St. Vincent       | 1812              | 24,253                        | 90.8                            | 2021   | 104,332                        | 74,284                 | 81 <sup>a</sup>    |
| Trinidad & Tobago | 1811              | 38,040                        | 81.8                            | 2021   | 1,525,663                      | 521,776                | 75 <sup>c</sup>    |

<sup>^</sup> Data from Knight<sup>2</sup>

<sup>\*</sup>Data from World Bank<sup>4</sup>

<sup>a</sup> Data from Oliveria<sup>S1</sup>

<sup>b</sup> Individual West African Ancestry Estimates Data from Benn-Torres<sup>S2</sup>

<sup>c</sup> Data from Benn-Torres<sup>S3</sup>

Supplementary References:

S1) De Oliveira TC, Secolin R, Lopes-Cendes I. A review of ancestrality and admixture in Latin America and the caribbean focusing on native American and African descendant populations. *Front Genet.* 2023 Jan 19;14:1091269.

S2) Benn-Torres J, Bonilla C, et al Admixture and population stratification in African Caribbean populations. *Ann Hum Genet.* 2008 Jan;72(Pt 1):90-8.

S3) Torres JB, Stone AC, Kittles R. An anthropological genetic perspective on Creolization in the Anglophone Caribbean. *Am J Phys Anthropol.* 2013 May;151(1):135-43.

**Supplemental Table 2: Priority areas for understanding the contribution of APOL1 polymorphisms to kidney disease in the Caribbean**

| Priority Areas                                                                        | Suggested approaches                                                               | Setting              |
|---------------------------------------------------------------------------------------|------------------------------------------------------------------------------------|----------------------|
| Prevalence of APOL1 high risk genotypes among patients with CKD                       | Clinic level studies performed during opportunistic encounters                     | CKD clinics          |
| Interaction between environmental stressors and APOL1 high risk genotypes             | Cohort studies within high-risk populations (e.g., in patients with lupus)         | Rheumatology clinics |
| Interaction between climate-change sensitive infections and APOL1 high risk genotypes | Case control studies among patients with infectious AKI from dengue, zika, malaria | Hospitals            |
| Contribution to ESKD prevalence                                                       | Developing a renal registry capturing cause of ESKD                                | Dialysis facilities  |

## SUPPLEMENTARY REFERENCES

- S1. De Oliveira TC, Secolin R, Lopes-Cendes I. A review of ancestry and admixture in Latin America and the Caribbean focusing on native American and African descendant populations. *Front Genet.* 2023;14:1091269.
- S2. Benn-Torres J, Bonilla C, et al Admixture and population stratification in African Caribbean populations. *Ann Hum Genet.* 2008;72:90-8.
- S3. Torres JB, Stone AC, Kittles R. An anthropological genetic perspective on Creolization in the Anglophone Caribbean. *Am J Phys Anthropol.* 2013;151:135-43.
- S4. Di Napoli C, Allen T, Méndez-Lázaro PA, Pappenberger F. Heat stress in the Caribbean: climatology, drivers, and trends of human biometeorology indices. *Int J Climatol.* 2023;43:405-425. doi:[10.1002/joc.7774](https://doi.org/10.1002/joc.7774)
- S5. Araújo Sde A, Cordeiro TME, Belisário AR, et al. First report of collapsing variant of focal segmental glomerulosclerosis triggered by arbovirus: dengue and Zika virus infection. *Clin Kidney J.* 2019;12:355-361. doi:[10.1093/ckj/sfy104](https://doi.org/10.1093/ckj/sfy104)
- S6. Rise N, Oura C, Drewry J. Climate change and health in the Caribbean: a review highlighting research gaps and priorities. *J Clim Change Health.* 2022;8:100126. doi:[10.1016/j.joclim.2022.100126](https://doi.org/10.1016/j.joclim.2022.100126)
- S7. Ferraro PM, Costanzi S, Naticchia A, Sturniolo A, Gambaro G. Low level exposure to cadmium increases the risk of chronic kidney disease: analysis of the NHANES 1999-2006. *BMC Public Health.* 2010;10:304. doi:10.1186/1471-2458-10-304
- S8. Fevrier-Paul A, Soyibo A, de Silva N, et al. Trace elements and chronic kidney disease: a cross-sectional study from Jamaica. *EMJ Nephrology.* 2021;9:79-90. DOI:[10.33590/emjnephrol/21-00042](https://doi.org/10.33590/emjnephrol/21-00042)
- S9. Lalor GC, Rattray R, Williams N, Wright P. Cadmium levels in kidney and liver of Jamaicans at autopsy. *West Indian Med J.* 2004;53:76-80.
